# Supplementary material
Source: PubMed Central journal article supplement (PMC4012842)
Supplement: NIHMS50537-supplement-1.pdf [file NIHMS50537-supplement-1.pdf]

Thomas Cullup, Ay L. Kho, Carlo Dionisi-Vici, Birgit Brandmeier, Frances Smith, Zoe Urry, Michael A. Simpson, Shu Yau, Enrico Bertini, Verity McClelland, Mohammed Al-Owain, Stefan Koelker, Christian Koerner, Georg F. Hoffmann, Frits A. Wijburg, Amber E. ten Hoedt, Curtis Rogers, David Manchester, Rie Miyata, Masaharu Hayashi, Elizabeth Said, Doriette Soler, Peter M. Kroisel, Christian Windpassinger, Francis M. Filloux, Salwa Al-Kaabi, Jozef Hertecant, Miguel Del Campo, Stefan Buk, Istvan Bodi, Hans-Hilmar Goebel, Caroline A. Sewry, Stephen Abbs, Shehla Mohammed, Dragana Josifova, Mathias Gautel, Heinz Jungbluth

**Recessive mutations in *EPG5* cause Vici syndrome, a multisystem disorder with defective autophagy**

**SUPPLEMENTARY FILES**

| F  | Pat  | ACC | CNS <sup>1</sup> | Seizures | Cataracts <sup>2</sup> | Sensorineural Deafness | Cardiac involvement <sup>3</sup> | Hypopigmentation | Immunodeficiency <sup>4</sup> | Myopathy | Other features                                                       | Outcome <sup>5</sup> |
|----|------|-----|------------------|----------|------------------------|------------------------|----------------------------------|------------------|-------------------------------|----------|----------------------------------------------------------------------|----------------------|
| 1  | 1.1  | ND  | ND               | +        | +                      | ND                     | +                                | +                | +                             | ND       | Microcephaly, nystagmus, cleft lip, hypospadias, FTT, thymus aplasia | Died 2y              |
|    | 1.2  | +   | +                | +        | +                      | ND                     | +                                | +                | +                             | ND       | Microcephaly, Cleft lip and palate, thymus hypoplasia                | Died 3y              |
| 2  | 2.1  | +   | +                | -        | +                      | +                      | +                                | +                | +                             | +        | Microcephaly, Nystagmus, obstructive sleep apnoea                    | Alive 3y             |
| 3  | 3.1  | +   | +                | -        | +                      | +                      | +                                | +                | +                             | +        | Nystagmus                                                            | Died 3m              |
| 4  | 4.1  | +   | +                | +        | +                      | ND                     | -                                | +                | +                             | +        | PFO, hepatomegaly, liver dysfunction                                 | Alive 3m             |
| 5  | 5.1  | +   | -                | +        | +                      | ND                     | +                                | +                | +                             | ND       | -                                                                    | Alive 4y             |
|    | 5.2  | +   | -                | -        | +                      | -                      | +                                | +                | +                             | ND       | -                                                                    | Alive 3y             |
| 6  | 6.1  | +   | -                | -        | +                      | ND                     | +                                | +                | +                             | +        | Renal impairment, Chronic anaemia                                    | Died 9m              |
| 7  | 7.1  | +   | -                | +        | +                      | +                      | +                                | +                | +                             | +        | -                                                                    | Alive 3y             |
| 8  | 8.1  | +   | +                | +        | +                      | ND                     | +                                | +                | +                             | ND       | Thymus hypoplasia, thyroid agenesis, Hypothyroidism                  | Died 8y              |
|    | 8.2  | +   | +                | +        | +                      | ND                     | +                                | +                | +                             | ND       | 2 <sup>nd</sup> -3 <sup>rd</sup> toe syndactyly, scoliosis           | Died 8y              |
| 9  | 9.1  | +   | +                | +        | +                      | ND                     | +                                | +                | +                             | +        | Pulmonary hypoplasia                                                 | Died 9m              |
| 10 | 10.1 | +   | +                | +        | -                      | ND                     | +                                | +                | +                             | ND       | Microcephaly, Nystagmus, renal tubular acidosis, anaemia             | Died 1y              |
| 11 | 11.1 | +   | -                | -        | +                      | -                      | +                                | +                | +                             | +        | Liver dysfunction                                                    | Died 2y              |
| 12 | 12.1 | +   | +                | +        | +                      | ND                     | +                                | +                | +                             | +        | -                                                                    | Alive 2y             |
| 13 | 13.1 | +   | +                |          | +                      | ND                     | +                                | +                | +                             | ND       | High arched palate, 2 <sup>nd</sup> -3 <sup>rd</sup> toe syndactyly  | Alive 2y             |
| 14 | 14.1 | +   | -                | -        | +                      | ND                     | -                                | +                | +                             | ND       | Microcephaly, PFO, ASD, hydronephrosis                               | Alive 10y            |
| 15 | 15.1 | +   | -                | -        | +                      | ND                     | -                                | +                | +                             | ND       | Cleft palate                                                         | Alive 4y             |

**Supplementary Table 1**

## **SUPPLEMENTARY TABLE 1**

**Clinical features in patients with Vici syndrome.** Patients were included in the study if 4 of the 5 major diagnostic criteria (callosal agenesis, cataracts, cardiomyopathy, hypopigmentation and immunodeficiency) were fulfilled (for review,<sup>5</sup>). 1) Additional CNS abnormalities included (in order of frequency) cerebellar and pontine hypoplasia, paucity of white matter and ventricular dilatation, heterotopias, abnormalities of the septum pellucidum, and schizencephaly. 2) Cataracts were reported as central lens opacifications in patient 13.1, but no specific information regarding the nature and location of cataracts was available in other patients. 3) 15/18 patients had evidence of a cardiomyopathy, based on the presence of marked cardiomegaly on chest X-ray, and/or specific findings on cardiac US, and/or findings post mortem examination. Some patients were historical cases who presented at a time where cardiac US was not routinely performed, or had died before a more detailed cardiac assessment had been performed. Specific findings suggested a dilated cardiomyopathy with left ventricular emphasis in patients 1.2, 2.1, 8.2, 10.1, whereas findings in patients 3.1, 9.1, 11.1 and 13.1 were suggestive of a hypertrophic cardiomyopathy, again with left ventricular emphasis. Interestingly, cardiac ultrasound in patient 8.1 suggested a hypertrophic cardiomyopathy, whereas findings on post mortem in the same patients were suggestive of a dilated cardiomyopathy. In some patients, cardiac assessment was normal when done very early in life but abnormal findings evolved over time. Patient 12.1 had evidence of a transient cardiomyopathy during an intercurrent illness that appeared to have resolved on subsequent cardiology follow-up. 4) In most patients the suspicion of an associated immunodeficiency was based on clinical findings of an increased number and/or unusual types of infection. Findings were suggestive of a combined immunodeficiency in those patients (1.1, 1.2, 2.1)<sup>1,8</sup> who had the most detailed immunological assessments. 5) In our cohort, Vici syndrome presented as a severe condition with only half of all patients still alive at the time of last

follow-up. The most common causes of death were progressive cardiac failure and recurrent infections. The oldest survivor, a girl without confirmed *EPG5* mutation and no cardiac involvement (Patient 14.1), was 10 years, whereas the oldest genetically confirmed case (Patient 5.1) was 4 years at the last follow-up. None of our patients had achieved independent ambulation. ACC = agenesis of the corpus callosum; PFO = persistent foramen ovale; ASD = atrial-septal defect; FTT = failure to thrive; + = feature present, - = feature absent, ND = not determined.

| Patient                         | 2        | 4        | 5.1      | 5.2      |
|---------------------------------|----------|----------|----------|----------|
| Total mapped reads              | 61375961 | 65964183 | 61538769 | 61771882 |
| Reads mapped to target          | 35130476 | 41436491 | 34807833 | 34788484 |
| Percentage                      | 57.24    | 62.82    | 56.56    | 56.32    |
| Reads mapped to target +/-150bp | 40445422 | 48862241 | 40235007 | 41517629 |
| Percentage                      | 65.9     | 74.07    | 65.38    | 67.21    |
| Mean Coverage                   | 64.24    | 73.62    | 63.34    | 62.37    |
| Target bases                    | 27812282 | 27812282 | 27812282 | 27812282 |
| Target bases at 1x coverage     | 27226331 | 27161438 | 27159756 | 27140738 |
| - Percentage                    | 97.89    | 97.66    | 97.65    | 97.58    |
| Target bases at 5x coverage     | 26367664 | 26238303 | 26249885 | 25986174 |
| - Percentage                    | 94.81    | 94.34    | 94.38    | 93.43    |
| Target bases at 10x coverage    | 25295211 | 25103044 | 25073500 | 24522650 |
| - Percentage                    | 90.95    | 90.26    | 90.15    | 88.17    |
| Target bases at 20x coverage    | 22766150 | 22750565 | 22539027 | 21693999 |
| - Percentage                    | 81.86    | 81.8     | 81.04    | 78       |

## SUPPLEMENTARY TABLE 2

Data output from the KCL/Linux pipeline.

|                                      | NextGene |       | Linux |       |
|--------------------------------------|----------|-------|-------|-------|
|                                      | P5.1     | P5.2  | P5.1  | P5.2  |
| Total variants called                | 19103    | 18459 | 19963 | 19375 |
| Novel variants                       | 2545     | 2558  | 684   | 664   |
| - Novel non-synonymous variants      | 1920     | 1939  | 485   | 469   |
| Total shared non-synonymous variants | 990      |       | -     |       |
| Total genes with 2x novel variants   | 122      |       | 25    |       |
| - Compound heterozygous              | 113      |       | 14    |       |
| - Homozygous                         | 9        |       | 11    |       |
| Total shared homozygous genes        |          | 5     |       |       |

## SUPPLEMENTARY TABLE 3

Numbers of variants detected by NextGene/Linux pipelines for Patients 5.1 and Patient 5.2

| <b>KIAA1632 / EPG5 Sequencing primers</b> |                          |
|-------------------------------------------|--------------------------|
| KIAA1632_Ex01_F_T1_v1                     | GGAGTGGTTTGTCTACGTT      |
| KIAA1632_Ex01_R_T1_v1                     | ATCAAATATTGGAAGGTGGAG    |
| KIAA1632_Ex02_1_F_T1_v1                   | CACATTTCTGTTTCATATTTGTTC |
| KIAA1632_Ex02_1_R_T1_v1                   | ACCGACATATTTTCCTCTACCT   |
| KIAA1632_Ex02_2_F_T1_v1                   | ATAAGCAATGAAGAGTCCCTGA   |
| KIAA1632_Ex02_2_R_T1_v1                   | GGTACTAGTTCAGTTGAGACG    |
| KIAA1632_Ex02_3_F_T1_v1                   | TGGTTTGTTCCTCAGAGGTG     |
| KIAA1632_Ex02_3_R_T1_v1                   | TGATCCCTGCACTCTATTACTC   |
| KIAA1632_Ex03_F_T1_v1                     | TCCTCACCATGATTATAAGCTC   |
| KIAA1632_Ex03_R_T1_v1                     | AAATGGTACCTTGTAAGACCAA   |
| KIAA1632_Ex04_F_T1_v1                     | AACTTTTCTCCTTTTATCTGCAC  |
| KIAA1632_Ex04_R_T1_v1                     | TCATCAAATAAATTAGCTGAAAAA |
| KIAA1632_Ex05_F_T1_v1                     | TAGATTTGTAGGCCTCGTAGAA   |
| KIAA1632_Ex05_R_T1_v1                     | TAGCCCAACAAGTTTCAGTCTA   |
| KIAA1632_Ex06_F_T1_v2                     | GGCTGTGCTTTACTCTTGTGT    |
| KIAA1632_Ex06_R_T1_v2                     | CAGTTGAAGGGTCACTTTGA     |
| KIAA1632_Ex07_F_T1_v2                     | GCAGTTTTATTAGCCTTGGTTT   |
| KIAA1632_Ex07_R_T1_v1                     | AAGTCTTTACCTCATGGAGTTG   |
| KIAA1632_Ex08_F_T1_v2                     | CCATTGAGACCTGTGATAATTT   |
| KIAA1632_Ex08_R_T1_v2                     | GCCACTACCACATTTTACACTT   |
| KIAA1632_Ex09_F_T1_v1                     | GAGACTGTCAGTTCTTCTCCAC   |
| KIAA1632_Ex09_R_T1_v1                     | CCTGAGGTTTACAACATAAAACG  |
| KIAA1632_Ex10_F_T1_v1                     | TCAGAACCTGGACAATAGTAGG   |
| KIAA1632_Ex10_R_T1_v1                     | GAGAGAGAGACCATTTCAGTCA   |
| KIAA1632_Ex11_F_T1_v1                     | GGTGGTTTGTATTTGCTGTTAT   |
| KIAA1632_Ex11_R_T1_v1                     | ATCAAACTGTGAAGCAGTCTC    |
| KIAA1632_Ex12_F_T1_v1                     | ATTTTGAACAAAGAAAGACCT    |
| KIAA1632_Ex12_R_T1_v1                     | TCCCTGTAGCAAATAATGTTC    |
| KIAA1632_Ex13_F_T1_v1                     | TGTAAGATTCTTTCTGCTTTGC   |
| KIAA1632_Ex13_R_T1_v1                     | GCTGGCACAGTAAATGTTAGTT   |
| KIAA1632_Ex14_F_T1_v1                     | AATTAACAATAAACTCCAGTTCC  |
| KIAA1632_Ex14_R_T1_v1                     | GCAAATGGTACTCAGAAATGTT   |
| KIAA1632_Ex15_F_T1_v1                     | GGAACATTTAGCTTCTACATCG   |
| KIAA1632_Ex15_R_T1_v1                     | TCTTTATCAAACCATAGAAGTCAA |
| KIAA1632_Ex16_F_T1_v1                     | GGTCACAAAAGGAGATGAGTGT   |
| KIAA1632_Ex16_R_T1_v1                     | CTCCCCTTGATAAGCTGTTAAT   |
| KIAA1632_Ex17_F_T1_v1                     | CTGAGATAACCCAAGGTATTGA   |
| KIAA1632_Ex17_R_T1_v1                     | ATACGCTGTTGAAATAGCATTCC  |
| KIAA1632_Ex18_F_T1_v1                     | CTTAAATAGTGCTTTGGTCGAA   |
| KIAA1632_Ex18_R_T1_v1                     | CAAAAGCACACTAAGCCAAG     |
| KIAA1632_Ex19_F_T1_v1                     | GGGATTTGTAGTGGAGGTAGAT   |
| KIAA1632_Ex19_R_T1_v1                     | TCTACGCTAGTGGACTACGATT   |
| KIAA1632_Ex20_F_T1_v1                     | GCTTGTTACATTTGGCTGTAAT   |
| KIAA1632_Ex20_R_T1_v1                     | ACCAAAGGGCTACTGTAAAGAT   |
| KIAA1632_Ex21_F_T1_v2                     | GGTGTTAATTTTAGAAACTGCAA  |
| KIAA1632_Ex21_R_T1_v2                     | AAGTATTGGTTTGGTTGTTGAG   |
| KIAA1632_Ex22_F_T1_v1                     | AGAATAAAAAGCTGCCCTACAT   |
| KIAA1632_Ex22_R_T1_v1                     | AGAATGATTCCAACCTCACACTC  |
| KIAA1632_Ex23_F_T1_v1                     | TGGTGTATATCCACAATCACAG   |
| KIAA1632_Ex23_R_T1_v1                     | CCACCTTCCATATTCAATCTAA   |
| KIAA1632_Ex24_F_T1_v1                     | TTGGCCACATTTTCTGTATTAT   |
| KIAA1632_Ex24_R_T1_v1                     | CATCTGAGTGACTACCCATTTT   |
| KIAA1632_Ex25_F_T1_v1                     | GAGGACTTGGAGTAGACCACTT   |
| KIAA1632_Ex25_R_T1_v1                     | GAAATCTCTTTTAAAGCACCA    |
| KIAA1632_Ex26_F_T1_v1                     | GGCCTGTCTAGGGTAATAATTT   |

|                                                |                            |
|------------------------------------------------|----------------------------|
| KIAA1632_Ex26_R_T1_v1                          | TTGGTCAAACATCCTCATTGT      |
| KIAA1632_Ex27_F_T1_v1                          | TTATGTGTCTTTTGCTGACTA      |
| KIAA1632_Ex27_R_T1_v1                          | GGACTCATCTGGTACCTACAAA     |
| KIAA1632_Ex28_F_T1_v1                          | TCCTACAAAAGGCTTTGAACTA     |
| KIAA1632_Ex28_R_T1_v1                          | TAAAAATAAGTAGCAGGCCAGA     |
| KIAA1632_Ex29_F_T1_v1                          | ACATTTTCATGGGTGCTCTG       |
| KIAA1632_Ex29_R_T1_v1                          | TGGGTAAGACTCTGAACCTGTA     |
| KIAA1632_Ex30_F_T1_v1                          | TTGGAAGCAATAGGCTTATCTA     |
| KIAA1632_Ex30_R_T1_v1                          | GCTGTACCTGGAAACAAAACCT     |
| KIAA1632_Ex31_F_T1_v1                          | ATAAAATGCTGGGTAATTTTTG     |
| KIAA1632_Ex31_R_T1_v1                          | CAAGCCCTTTAGATGACAATTA     |
| KIAA1632_Ex32_F_T1_v1                          | GTTTTGGATTTTGGCTTTATTT     |
| KIAA1632_Ex32_R_T1_v1                          | TAACACAAAGAAAAACACATGG     |
| KIAA1632_Ex33_F_T1_v1                          | CCTACTATATACACCCCATCA      |
| KIAA1632_Ex33_R_T1_v1                          | CTTTCTCTCCTTGACACTCAAT     |
| KIAA1632_Ex34_F_T1_v1                          | TGTAGCCAATGAAAACGTAAAC     |
| KIAA1632_Ex34_R_T1_v1                          | ATGTCTTAAGTTTTGAAAAGAAGC   |
| KIAA1632_Ex35_F_T1_v1                          | GGTGTACAAGCTACAATTCG       |
| KIAA1632_Ex35_R_T1_v1                          | TTCAGTCACAAATAACTGCCTA     |
| KIAA1632_Ex36_F_T1_v1                          | GGTCAATCATGAGAACCTTAGA     |
| KIAA1632_Ex36_R_T1_v1                          | ACACTGCCACTATGCCTAAC       |
| KIAA1632_Ex37_F_T1_v1                          | AAGTGATATAATCTGGGGAAAAA    |
| KIAA1632_Ex37_R_T1_v1                          | CTGGAAAAACAAATGAAAAACT     |
| KIAA1632_Ex38_F_T1_v1                          | ACTGTTCTGTGCTTACCATAGG     |
| KIAA1632_Ex38_R_T1_v1                          | TGATAATACACATCCTCCGACT     |
| KIAA1632_Ex39_F_T1_v1                          | CCTGTTCTGTCCCCTCTACT       |
| KIAA1632_Ex39_R_T1_v1                          | CTCTCTGACCATTGCTTCTCT      |
| KIAA1632_Ex40_F_T1_v1                          | AGAACAGCTAAGATTGAAGCAC     |
| KIAA1632_Ex40_R_T1_v1                          | ATTCAGAAACATCCACAACATT     |
| KIAA1632_Ex41_F_T1_v1                          | TCTCATAGGTTGCTATGTCAA      |
| KIAA1632_Ex41_R_T1_v1                          | ATCTTTCCAAAACAACTGTCAC     |
| KIAA1632_Ex42_F_T1_v1                          | CTTCAAACCTCTGATGTGGACTT    |
| KIAA1632_Ex42_R_T1_v1                          | GTCCAAACACAACAGGAGATAC     |
| KIAA1632_Ex43_F_T1_v1                          | TGAACAACACAGTAGATCTGGA     |
| KIAA1632_Ex43_R_T1_v1                          | GAAACCATTTTCCCCTAAGTAG     |
| KIAA1632_Ex44_F_T1_v2                          | CCTTCTGGTTGTGGTTAAGTT      |
| KIAA1632_Ex44_R_T1_v2                          | CTTAAAGAGTCCCCAGAAGGT      |
| <b>KIAA1632 / EPG5 cDNA sequencing primers</b> |                            |
| KIAA1632_RNA_Primary_F                         | TATGTGAATCGTGAAGAACAGA     |
| KIAA1632_RNA_Primary_R                         | AGTGAAGAAAGGAGACAGCAG      |
| KIAA1632_RNA_Secondary_F                       | CAGTTGTACAGGTTCAGTTT       |
| KIAA1632_RNA_Secondary_R                       | GGTTTCAAGTACTTTTCTGCAC     |
| <b>KIAA1632 / EPG5 qPCR primers and probe</b>  |                            |
| KIAA1632_qPCR_F                                | GCTGAAGTGGCTTTAATGGTTC     |
| KIAA1632_qPCR_R                                | TTGGTTAATGAGGTCTCGGG       |
| KIAA1632_qPCR_Probe                            | CCAGCATATGGCTTCTGTGCAAGGTA |
| <b>ACTB qPCR primers and probe</b>             |                            |
| ACTB_qPCR_F                                    | ACCTTCTACAATGAGCTGCG       |
| ACTB_qPCR_R                                    | CCTGGATAGCAACGTACATGG      |
| ACTB_qPCR_Probe                                | CAACCGCGAGAAGATGACCCAGAT   |
| <b>TMEM49/VMP1 (hEPG3)</b>                     |                            |
| TMEM49_Ex02_F_T1_v1                            | AGTCACAGCTACACAGCAGAA      |

|                                        |                             |
|----------------------------------------|-----------------------------|
| TMEM49_Ex02_R_T1_v1                    | TGACCCATAATTTAATTTACTAAGAAG |
| TMEM49_Ex03_F_T1_v1                    | ACTAGTTGCCATTTTTACAAG       |
| TMEM49_Ex03_R_T1_v1                    | AGAGGGCAGAAAGTAAGAGATT      |
| TMEM49_Ex04_F_T1_v1                    | AGGTAACCTAACTGTTTCAGCA      |
| TMEM49_Ex04_R_T1_v1                    | ACCACATATAAATCCTCAGCAG      |
| TMEM49_Ex05_F_T1_v1                    | AAAGAAATTAGGCCTCTTCAAT      |
| TMEM49_Ex05_R_T1_v1                    | TCAGAATGCTTACAAAACACAA      |
| TMEM49_Ex06_F_T1_v1                    | GAAAGCTAAGATTTTTCTTACACAG   |
| TMEM49_Ex06_R_T1_v1                    | AGGTAGCTGGTACTGACTGAA       |
| TMEM49_Ex07_F_T1_v1                    | ATATTGCATCTCAAAATGCTTC      |
| TMEM49_Ex07_R_T1_v1                    | GGTTTCTGACAAGGTGTTTTAG      |
| TMEM49_Ex08_F_T1_v1                    | TCATCAGATTGGGAGATCTTTA      |
| TMEM49_Ex08_R_T1_v1                    | AGCACTTTTGTTAATTCAGGAG      |
| TMEM49_Ex09_F_T1_v1                    | GCAGAATACCACATATCAATGG      |
| TMEM49_Ex09_R_T1_v1                    | AAATAATTCACTTAGGAATGAGCA    |
| TMEM49_Ex10_F_T1_v1                    | CCCCAGCTAATTTTTGTATTTT      |
| TMEM49_Ex10_R_T1_v1                    | CAAGTTATTTTTGCTCCTCAAA      |
| TMEM49_Ex11_F_T1_v1                    | TCCAGGTGGTAAGTACATTTTC      |
| TMEM49_Ex11_R_T1_v1                    | GGCAAACCACTTCACTTATT        |
| TMEM49_Ex12_F_T1_v1                    | AGTAGTTGGGGTTGCTTACTTT      |
| TMEM49_Ex12_R_T1_v1                    | TACAGGTTGAAAAGGGAAT         |
|                                        |                             |
| <b>EI24 (hEPG4) sequencing primers</b> |                             |
| EI24_Ex02_F_T1_v1                      | CTCCATTATGTTCCATCTGTTT      |
| EI24_Ex02_R_T1_v1                      | AAAAGTTCCAAAAACCCTAAAG      |
| EI24_Ex03a_F_T1_v1                     | GATCATTGGAACCCAGGAGT        |
| EI24_Ex03a_R_T1_v1                     | AAATCACTTGCAACATTTTTCT      |
| EI24_Ex03b_F_T1_v1                     | CCCACACTTTCTCTTAATCTT       |
| EI24_Ex03b_R_T1_v1                     | ACGGCTGTAATCCTAACACTTT      |
| EI24_Ex04_F_T1_v1                      | ACATTAGAACATTGGGAGAACA      |
| EI24_Ex04_R_T1_v1                      | TCAGTGTTTCAAGAAAACAGTTC     |
| EI24_Ex05_F_T1_v1                      | AAGTCACTCCCATCTATAAAATCA    |
| EI24_Ex05_R_T1_v1                      | AAATAAACAGTGAAAGCTCCTG      |
| EI24_Ex06_F_T1_v1                      | ACAGAGAATAGTCACGAGATGG      |
| EI24_Ex06_R_T1_v1                      | GAAACATTAAGGCTGAAAAACA      |
| EI24_Ex07_F_T1_v1                      | CTTTTCTTAACTGGCAGCTCTA      |
| EI24_Ex07_R_T1_v1                      | TAAAAATCATTACCTCCCACCA      |
| EI24_Ex08_F_T1_v1                      | CAGCTAGGAAGCTATCTCAGAC      |
| EI24_Ex08_R_T1_v1                      | TTGAGAGTTAAACCCACTAAGC      |
| EI24_Ex09_F_T1_v1                      | AGCAAGACTCCATCTCAAATAA      |
| EI24_Ex09_R_T1_v1                      | CTGATGGACAAATGATGATGTA      |
| EI24_Ex10_11_F_T1_v1                   | GTTGAGATCTTGCCACTGACT       |
| EI24_Ex10_11_R_T1_v1                   | TTTTAAAAGCCTCACTGACAT       |
| EI24_Ex12_F_T1_v1                      | TATTCTTTAGTTGCCTGTTCCA      |
| EI24_Ex12_R_T1_v1                      | ATTCTCAGAGAGAAGGGAATA       |

#### SUPPLEMENTARY TABLE 4

List of primer sequences used in this study.



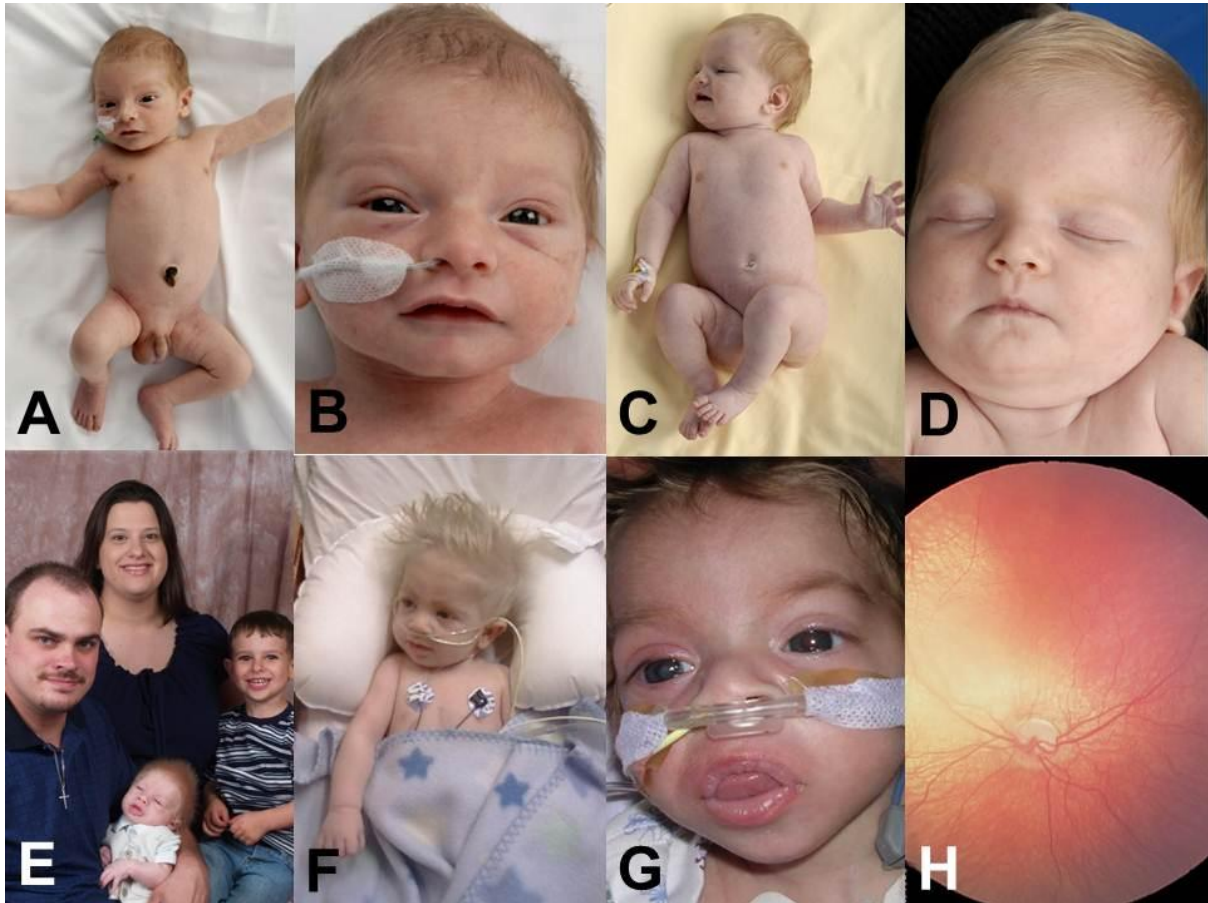

### SUPPLEMENTARY FIGURE 1

**Clinical features in patients with Vici syndrome.** Clinical photographs from Patients 5.1 (A,B) and 5.2 (C,D), Patient 6.1 (E,F), Patient 3.1 (G) and Patient 12.1 (H). There is marked generalized hypopigmentation relative to the ethnic background (A-D) (Patients 5.1 and 5.2 are siblings of Turkish origin) and other family members (E,F) (Patient 6.1). Coarsening of facial features with full lips and macroglossia is noted in some older children (G). There is marked retinal hypopigmentation on fundoscopy (H). Microcephaly was either present at birth or developed over time. Failure to thrive was a common finding. Informed consent was obtained from all individuals or the legal guardian of minors. Supplemental Figure 1G adapted from reference 5.

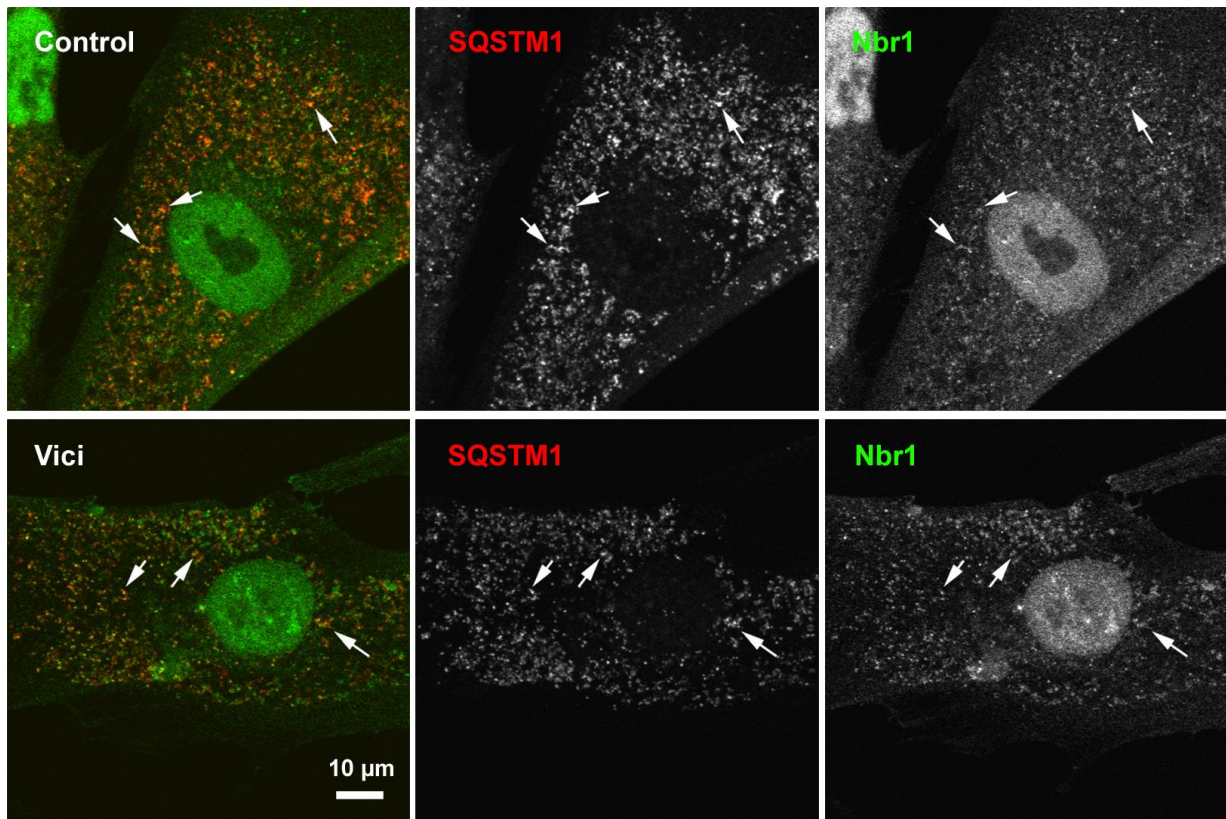

## SUPPLEMENTARY FIGURE 2

### Colocalisation of Nbr1- and p62/SQSTM1 positive puncta in Vici patient fibroblasts.

The colocalisation of p62/SQSTM1 with Nbr1 in puncta was assessed in control and Vici-patient fibroblasts in rapamycin/bafilomycin treated cells. The induction of autophagy and block of autolysosomal degradation with this treatment causes accumulation of Nbr1 and p62/SQSTM1 in both control and Vici-patient fibroblasts. Colocalising puncta (arrows) occur in both cells with a frequency of around 30%. Scale bar: 10  $\mu$ m.



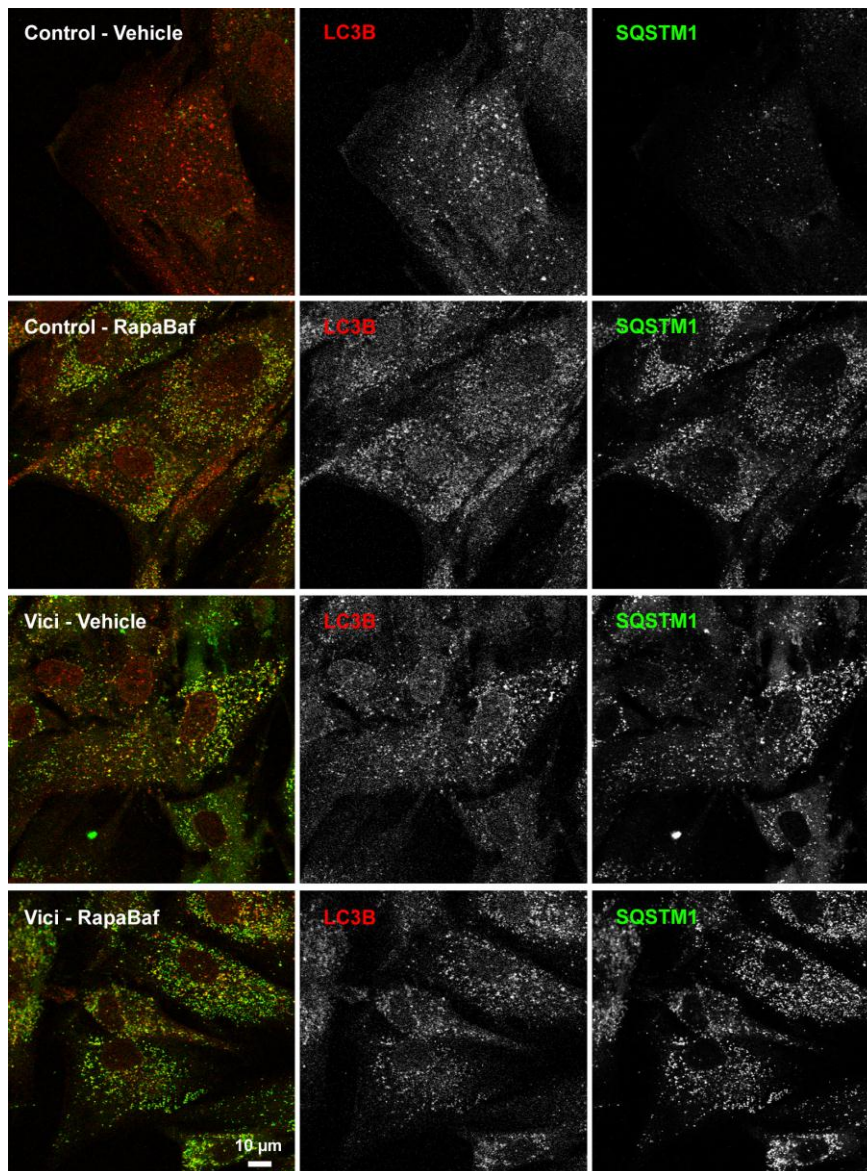

### SUPPLEMENTARY FIGURE 3

**Recruitment of p62/SQSTM1 to LC3-positive puncta is normal in Vici syndrome.** The colocalisation of p62/SQSTM1 with LC3-positive puncta was assessed in control and Vici-patient fibroblasts under control conditions and in rapamycin/bafilomycin treated cells (RapaBaf). While induction of autophagy and block of autolysosomal degradation (RapaBaf) causes accumulation of LC3 and p62/SQSTM1 in control cells, Vici-patient fibroblasts show massive accumulation of autophagosome-like puncta under baseline conditions that does not change appreciably under RapaBaf. Scale bar: 10 μm.

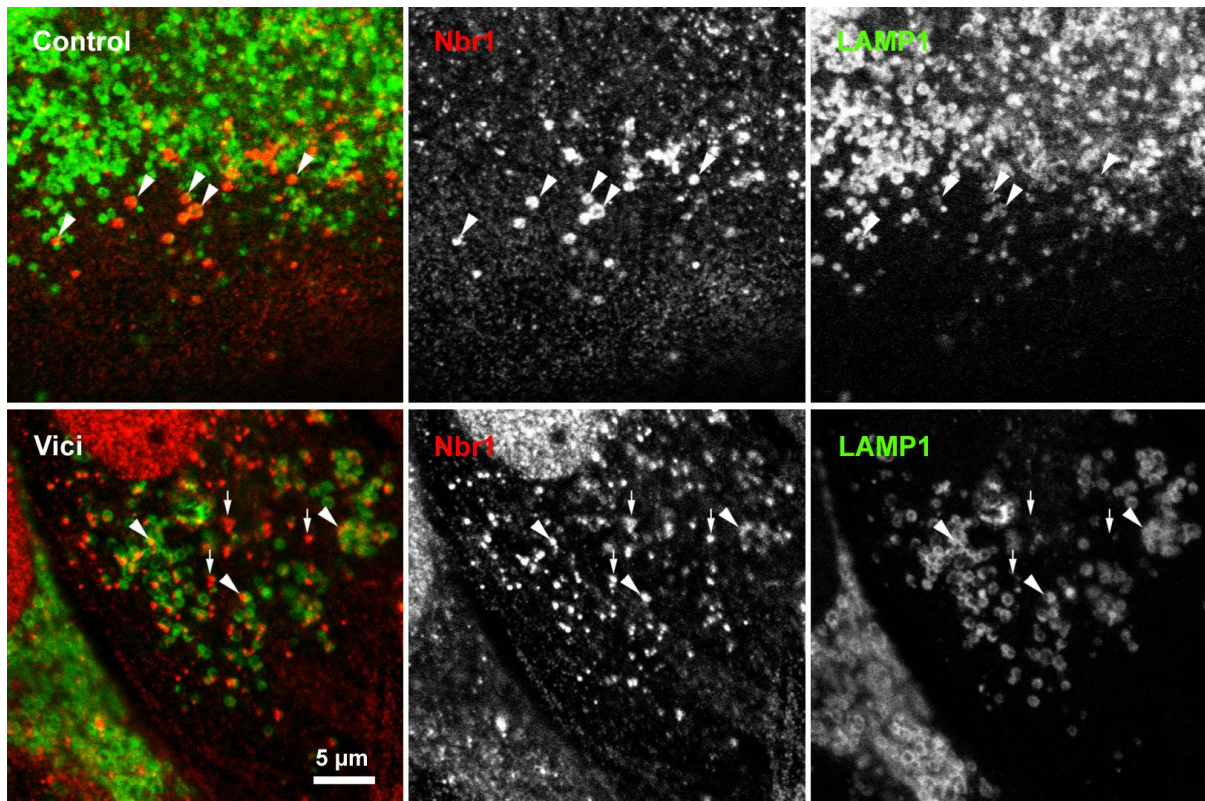

#### SUPPLEMENTARY FIGURE 4

**Abnormal fusion of Nbr1-positive puncta with lysosomes in Vici syndrome.** The autophagy adaptor Nbr1 and the lysosome membrane component LAMP1 colocalise in ring-shaped vesicular structures in control fibroblasts after 6 h treatment with bafilomycin (arrowheads). In Vici-patient fibroblasts (Patient 4.1), occasional fusion occurs in small puncta (arrowheads), but many non-fused Nbr1-positive puncta are observed (arrows). Scale bar: 5 μm

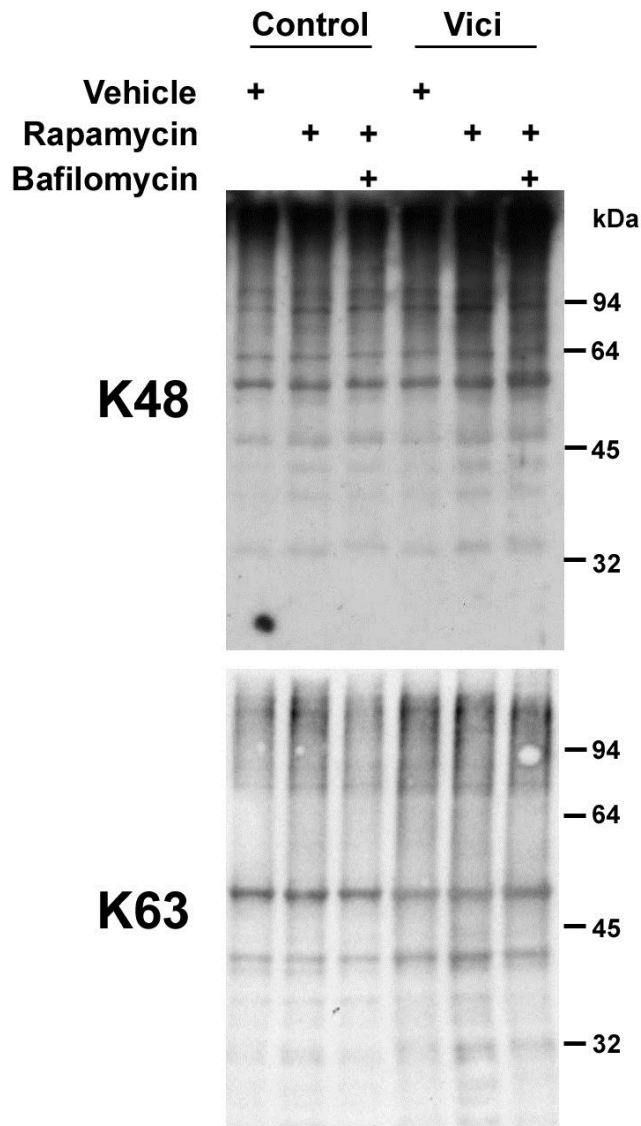

#### SUPPLEMENTARY FIGURE 5

##### **Defects in autophagy in Vici syndrome lead to elevated K63-poly-ubiquitylated proteins.**

Western blots of control and Vici-patient fibroblasts under baseline conditions and after 12h treatment with rapamycin, or dual treatment with rapamycin and bafilomycin with monoclonal antibodies against Lysine-48 (K48) and Lysine-63 (K63) polyubiquitin chains. K48-linked chains increase under rapamycin and rapamycin/bafilomycin treatment in both cells. K63-linked chains are elevated under baseline conditions in Vici cells, suggesting a defect of specific clearance of this type of poly-ubiquitylated products.

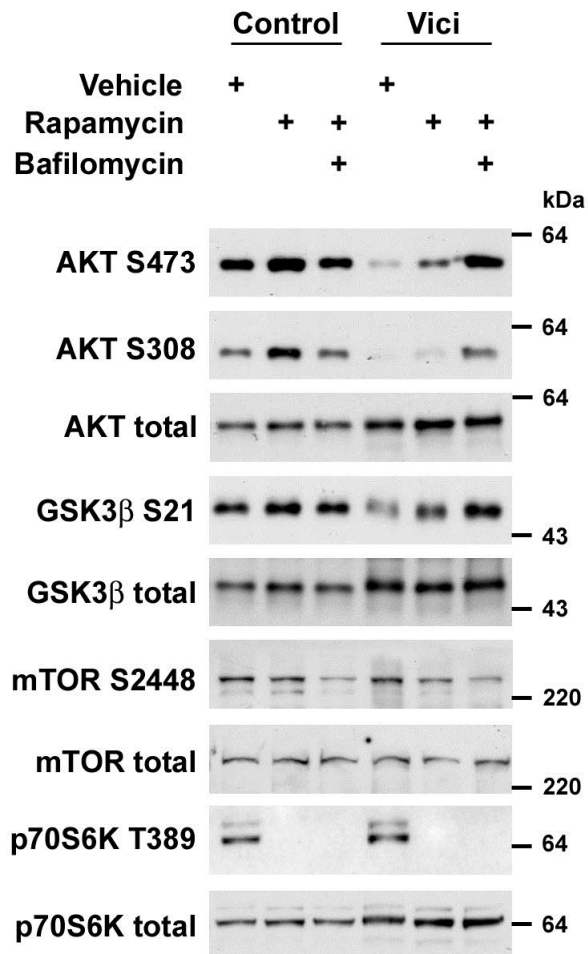

### SUPPLEMENTARY FIGURE 6

**Abnormal AKT-mTOR signalling in Vici syndrome.** The response of the AKT-mTOR pathway was probed in control and Vici-patient fibroblasts after 12h treatment with rapamycin, or dual treatment with rapamycin and bafilomycin. In control cells, rapamycin inhibits p70S6-kinase (p70S6K) phosphorylation as expected and induces slight increase in AKT (serines 473 and 308) and downstream glycogen-synthase kinase 3-beta (GSK3beta) phosphorylation due to inhibition of the negative feedback loop via p70S6kinase. Additional treatment with bafilomycin results in decrease of AKT, GSK3beta and mTOR phosphorylation. In Vici patient fibroblasts, strong baseline reduction of AKT and GSK3beta phosphorylation is observed that is paradoxically increased in rapamycin/bafilomycin treated cells.

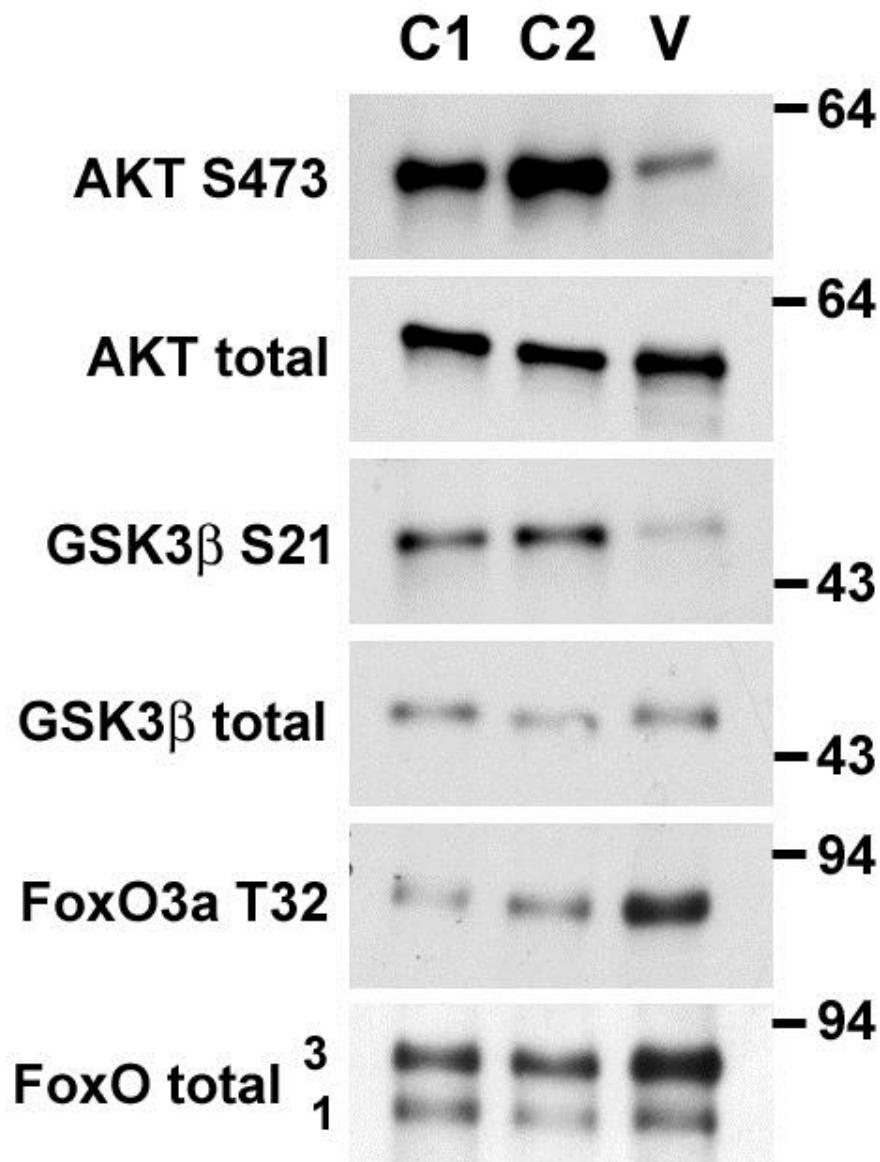

#### SUPPLEMENTARY FIGURE 7

**Abnormal AKT-FoxO signalling in Vici fibroblasts.** The AKT-FoxO pathway was probed in control and Vici-patient fibroblasts. In control cells (C1 and C2), phosphorylation of AKT (serines 473 and 308) and the downstream substrates glycogen-synthase kinase 3-beta (GSK3beta) and Foxo3a is high. In Vici patient fibroblasts (V), baseline reduction of AKT and GSK3beta phosphorylation is observed. As the levels of FoxoO are strongly upregulated, the ratio of phospho-FoxO3a (T32) to total FoxO3a are about 50% of control levels.



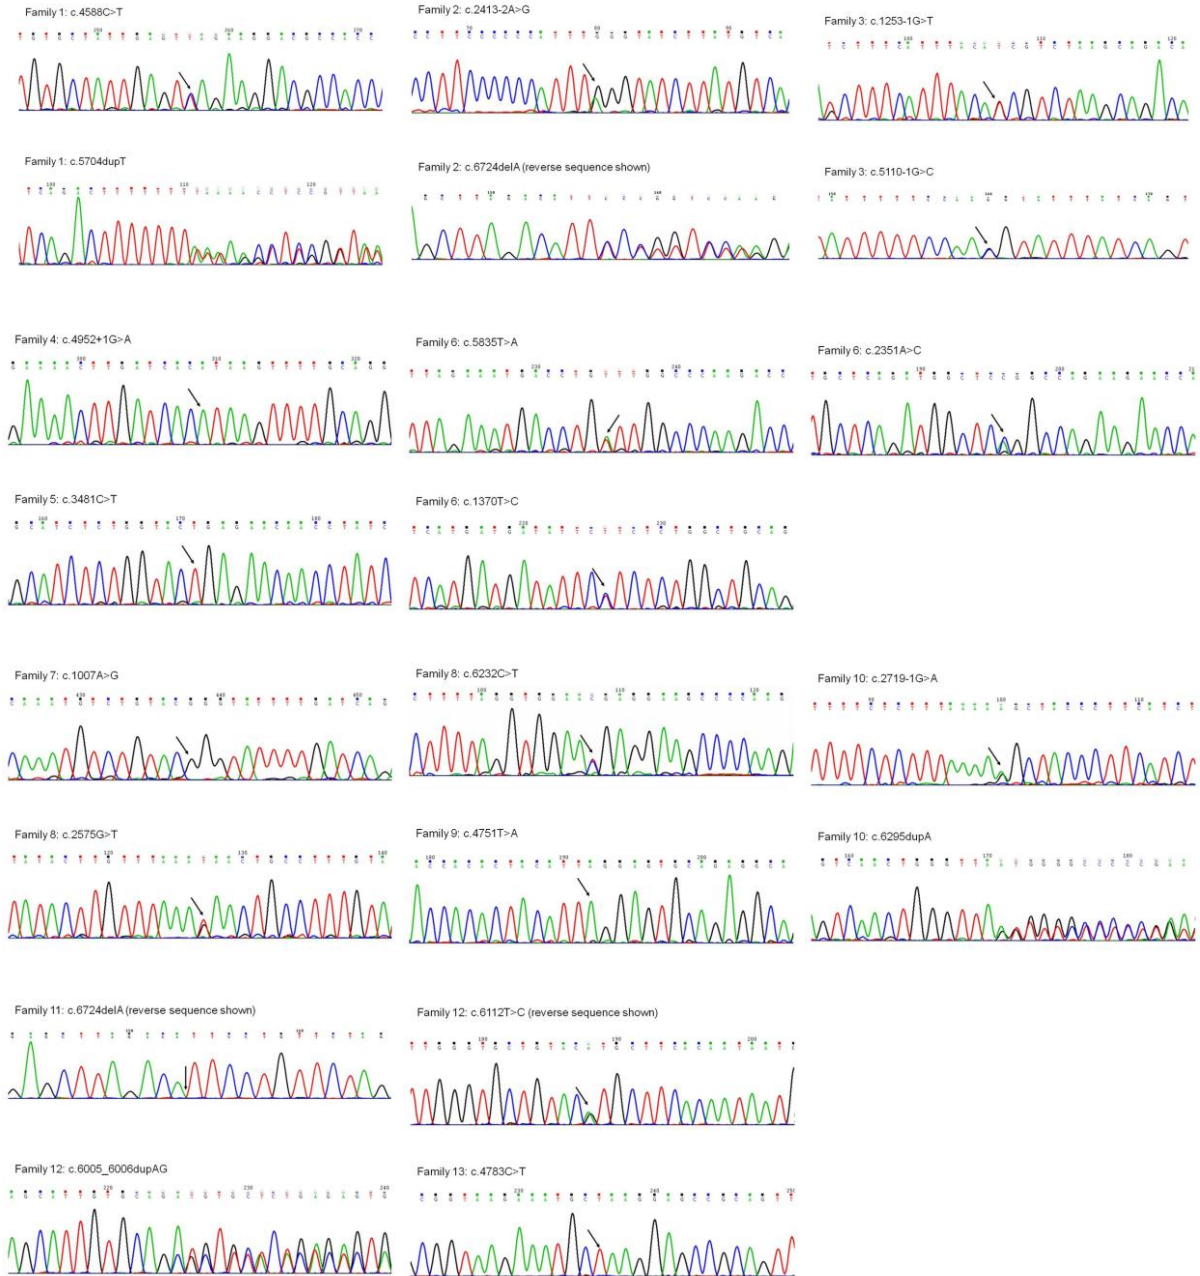

## SUPPLEMENTARY FIGURE 8

ABI traces for mutant alleles identified in Families 1-13.
